# Supplementary material
Source: Springer Nature journal article supplement (https://www.springermedizin.de/resource/supplementary/12985_2011_1402_MOESM3_ESM.pdf/9609740)

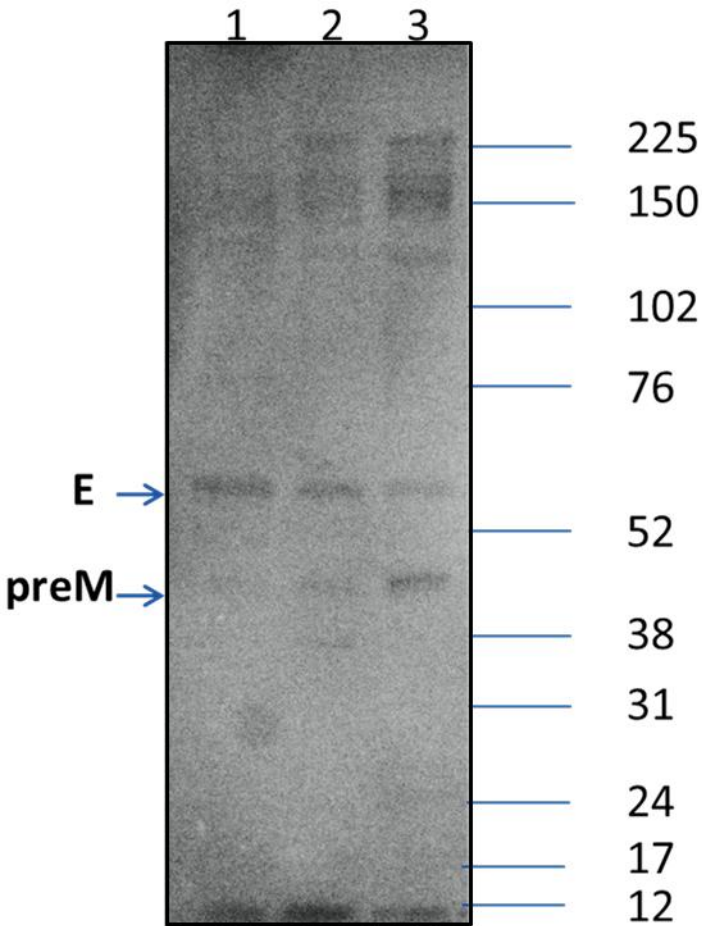

Supplement: MOESM3 [file 9609740]
